# Supplementary material
Source: Springer Nature journal article supplement (https://www.springermedizin.de/resource/supplementary/10194_2014_614_MOESM2_ESM.pdf/9423282)

A

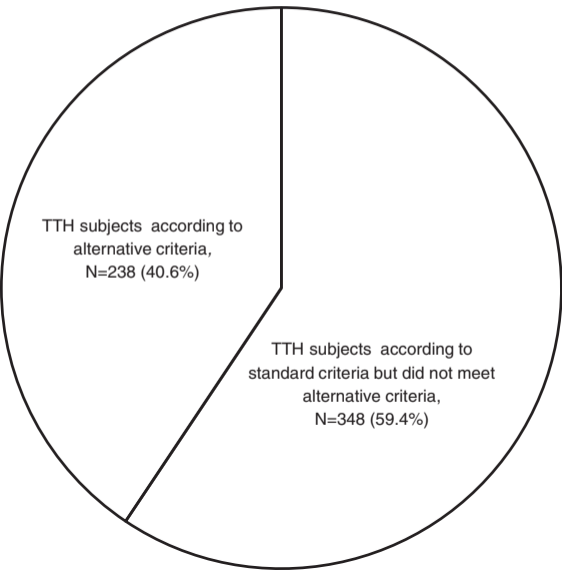

B

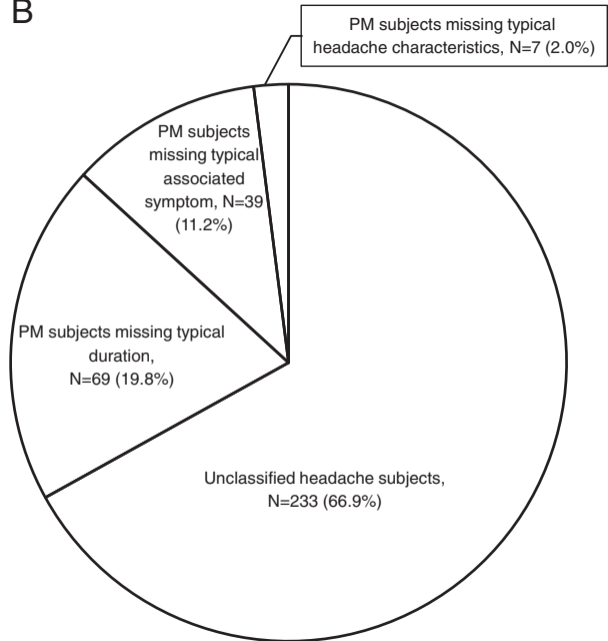

Supplement: MOESM2 [file 9423282]
